# Supplementary material
Source: PubMed Central journal article supplement (PMC3741052)
Supplement: NIHMS497163-supplement-02.pdf [file NIHMS497163-supplement-02.pdf]

**Table S2 – Clinical information for patients with seizures captured during RES and RES-II.**

| Pt # | # and types of seizures | MRI                                                                                              | PET Hypo-metabolism                        | Ictal SPECT hyper-perfusion | Scalp EEG onset <sup>a</sup> | Intracranial EEG onset <sup>a</sup>  | Overall localization      |
|------|-------------------------|--------------------------------------------------------------------------------------------------|--------------------------------------------|-----------------------------|------------------------------|--------------------------------------|---------------------------|
| 1    | 4 Partial<br>1 GTC      | Normal                                                                                           | LT                                         | LT                          | Bi T                         | R>L Mesial T                         | Bi T                      |
| 2    | 4 partial               | LT atrophy and polymicrogyria                                                                    | Normal                                     | LF                          | L>R H                        | Mostly R inf F-T, but some Bi or L T | Unlocalized               |
| 3    | 4 Partial               | R HC atrophy & LT gray matter abnormal                                                           | LT                                         | LT & RO                     | LT and RT                    | N/A                                  | RO and LT                 |
| 4    | 1 Partial<br>1 GTC      | Encephalomalacia, R T-P-O                                                                        | R P-O-T                                    | N/A                         | RH                           | R lat F, cingulate, medial O         | RH                        |
| 5    | 2 Partial               | Previous LT resection                                                                            | R lat T                                    | R T                         | R>L T                        | R mesial T, and R T-O                | RT, O                     |
| 6    | 1 Partial               | Previous LT resection                                                                            | Normal                                     | N/A                         | LT and RT                    | L HC, L fusiform gyrus               | L HC, L fusiform gyrus    |
| 7    | 1 GTC                   | Normal                                                                                           | N/A                                        | N/A                         | LF                           | N/A                                  | LF                        |
| 8    | 1 Partial               | Normal                                                                                           | N/A                                        | N/A                         | LT                           | N/A                                  | LT                        |
| 9    | 1 Partial               | Increased T2 signal in bilateral HC and R P cortex                                               | N/A                                        | N/A                         | BiT                          | N/A                                  | R P-T                     |
| 10   | 1 GTC                   | Normal                                                                                           | LT                                         | N/A                         | LH                           | LF                                   | LF                        |
| 11   | 2 Partial               | R HC atrophy, RF, P infarct                                                                      | RT, and in area of R F, P infarct          | N/A                         | RT                           | N/A                                  | RT                        |
| 12   | 1 GTC                   | Normal                                                                                           | N/A                                        | N/A                         | RT                           | N/A                                  | RT                        |
| 13   | 12 Partial              | R sup F gyrus thickening consistent with cortical dysplasia                                      | RF                                         | N/A                         | RF                           | R med F                              | RF                        |
| 14   | 2 Partial               | L HC enlarged and increased T2 signal                                                            | LT                                         | N/A                         | LT                           | N/A                                  | LT                        |
| 15   | 6 partial               | R precentral gyrus increased T2                                                                  | Normal                                     | N/A                         | No EEG changes               | RF (primary motor cortex)            | RF (primary motor cortex) |
| 16   | 2 Partial               | LF encephalomalacia and increased T2 signal consistent with previous oligodendroglioma resection | LF signal loss and mild RF hypermetabolism | N/A                         | No EEG changes               | N/A                                  | Unlocalized               |
| 17   | 7 Partial               | LT heterotopia                                                                                   | N/A                                        | N/A                         | Bi F                         | N/A                                  | Unlocalized               |
| 18   | 5 partial               | Normal                                                                                           | mild RT                                    | N/A                         | LH                           | N/A                                  | LH                        |
| 19   | 2 Partial               | Previous R F resection                                                                           | Normal                                     | N/A                         | Multifocal                   | N/A                                  | Unlocalized               |
| 20   | 1 partial<br>2 GTC      | Bi R>L HC atrophy                                                                                | Normal                                     | N/A                         | R T-P                        | N/A                                  | RH                        |
| 21   | 4 partial               | Normal                                                                                           | Bi T                                       | N/A                         | L H                          | Multifocal                           | Unlocalized               |
| 22   | 1 Partial               | Bi cingulate and L insular cortex increased T2                                                   | N/A                                        | N/A                         | BiF                          | N/A                                  | Unlocalized               |
| 23   | 5 Partial               | R HC atrophy, R O indistinct sulci                                                               | R T                                        | N/A                         | RT                           | R H diffuse onset                    | RH                        |
| 24   | 1 Partial               | L MCA encephalomalacia (s/p peri-natal MCA stroke)                                               | L basal ganglia, LT                        | LF precentral gyrus         | No EEG changes               | N/A                                  | LH                        |

|    |                    |                                 |        |                            |                      |                    |                    |
|----|--------------------|---------------------------------|--------|----------------------------|----------------------|--------------------|--------------------|
| 25 | 1 Partial          | R HC atrophy and increased T2   | Normal | N/A                        | R C, T               | N/A                | RH                 |
| 26 | 2 Partial          | R insula increased FLAIR signal | RT     | BiF                        | BiF, non-lateralized | N/A                | Unlocalized        |
| 27 | 1 Partial          | Normal                          | N/A    | LT                         | RT                   | N/A                | Unlocalized        |
| 28 | 1 Partial          | Normal                          | LF     | N/A                        | L F, T               | L precentral gyrus | L precentral gyrus |
| 29 | 1 Partial          | Normal                          | Normal | R T, O                     | Bi F (R>L)           | N/A                | Unlocalized        |
| 30 | 1 Partial          | Bi T increased T2               | N/A    | N/A                        | Bi T (independently) | N/A                | Bi T               |
| 31 | 1 Partial          | Normal                          | Bi T   | N/A                        | Bi T                 | N/A                | Bi T               |
| 32 | 2 Partial          | R HC atrophy                    | RT     | N/A                        | RT                   | N/A                | RT                 |
| 33 | 4 Partial<br>1 GTC | Normal                          | RT     | Bilateral multiple regions | R F, T               | N/A                | RH                 |
| 34 | 12 Partial         | L HC atrophy                    | LT     | N/A                        | LT                   | N/A                | LT                 |
| 35 | 7 Partial          | R MCA and PCA encephalomalacia  | N/A    | N/A                        | Bi F                 | N/A                | Unlocalized        |

Patients #1-24 tested with RES, patients #25-35 tested with RES-II. <sup>a</sup>Based on overall EEG of all seizures, not just seizure occurring during RES. Abbreviations: HC=hippocampus, R=right, L=left, O=occipital, T=temporal, P=parietal, F=frontal, Sup=superior, Lat=lateral, Inf=inferior, Bi=bilateral, H=hemisphere, GTC=secondarily generalized tonic-clonic, sz=seizure, Pt=patient.
